# Supplementary material
Source: HighWire-hosted journal article supplement (http://thorax.bmjjournals.com/highwire/filestream/173891/field_highwire_adjunct_files/1/628684webonlyapp2.pdf)

Figure 1

a)

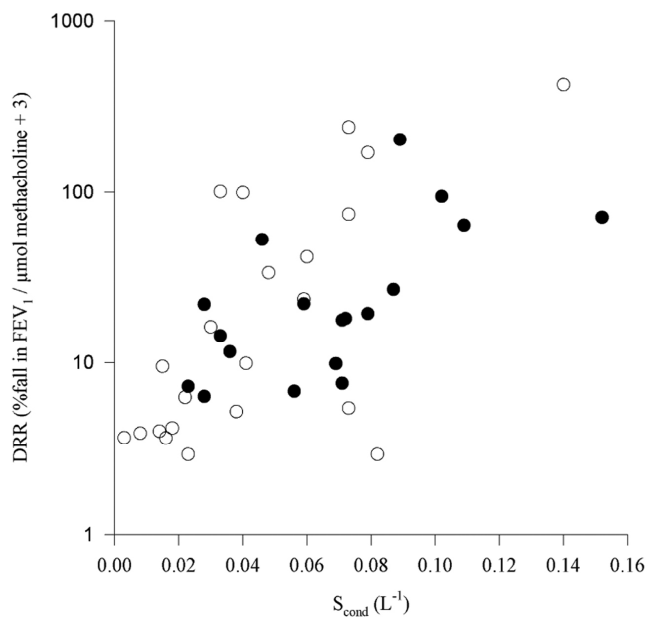

b)

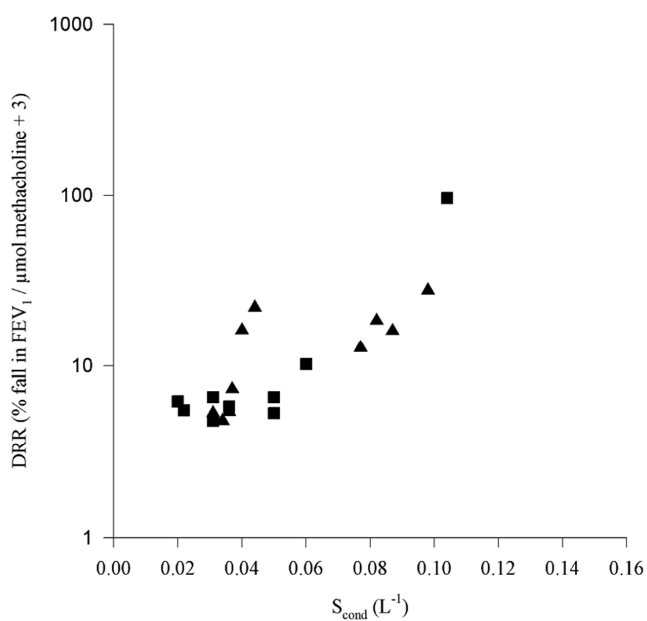

Supplement: 628684webonlyapp2.pdf [file 628684webonlyapp2.pdf]
